# Supplementary material
Source: ML conference proceedings conference paper supplement (https://proceedings.neurips.cc/paper_files/paper/2021/hash/dcc5c249e15c211f21e1da0f3ba66169-Abstract.html)
Supplement: Supplementary file 1 [file dcc5c249e15c211f21e1da0f3ba66169-Supplemental.zip]

Archive with 2 entries (2 files):
- appendix.pdf
- __MACOSX/._appendix.pdf
